# Supplementary material for: The valence electron affinity of uracil determined by anion cluster photoelectron spectroscopy
Source: Royal Society of Chemistry journal article supplement (doi:10.1039/d4cp02146k), 2024-01-01
Supplement: d4cp02146k1.pdf [file d4cp02146k1.pdf]

**Supplementary Information for:**

**The valence electron affinity of uracil determined by anion cluster  
photoelectron spectroscopy**

Connor J. Clarke<sup>1</sup>, E. Michi Burrow<sup>1</sup>, Jan R. R. Verlet<sup>1,2\*</sup>

<sup>1</sup>*Department of Chemistry, Durham University, Durham DH1 3LE, United Kingdom*

<sup>2</sup>*J. Heyrovský Institute of Physical Chemistry, Czech Academy of Sciences,  
Dolejškova 3, 18223 Prague 8, Czech Republic*

*Email: j.r.r.verlet@durham.ac.uk*

## Calibration of electron-binding energies

Our extracted electron binding energy for the DBS of U was:  $EA_D = +75 \pm 6$  meV. Other experimental studies are in agreement with this value,<sup>1,2</sup> but some report a slightly higher binding energy ( $\sim 90$  meV).<sup>3,4</sup> Details of our calibration process are included below.

Atomic iodide,  $I^-$ , was the selected calibrant. Following photodetachment with 266 nm laser pulses ( $h\nu = 4.661$  eV), two peaks are observed in the photoelectron spectrum (Fig. S1(a)), corresponding to formation of neutral I in either the  $^2P_{3/2}$  (ground) or  $^2P_{1/2}$  (excited) state. The electron affinity of I is  $EA = 3.0590$  eV,<sup>5</sup> and the spin-orbit splitting between the two peaks is  $E_{SO} = 0.9427$  eV.<sup>6</sup> The two peaks were fit with Gaussian functions, providing calibration for the velocity map imaging spectrometer.

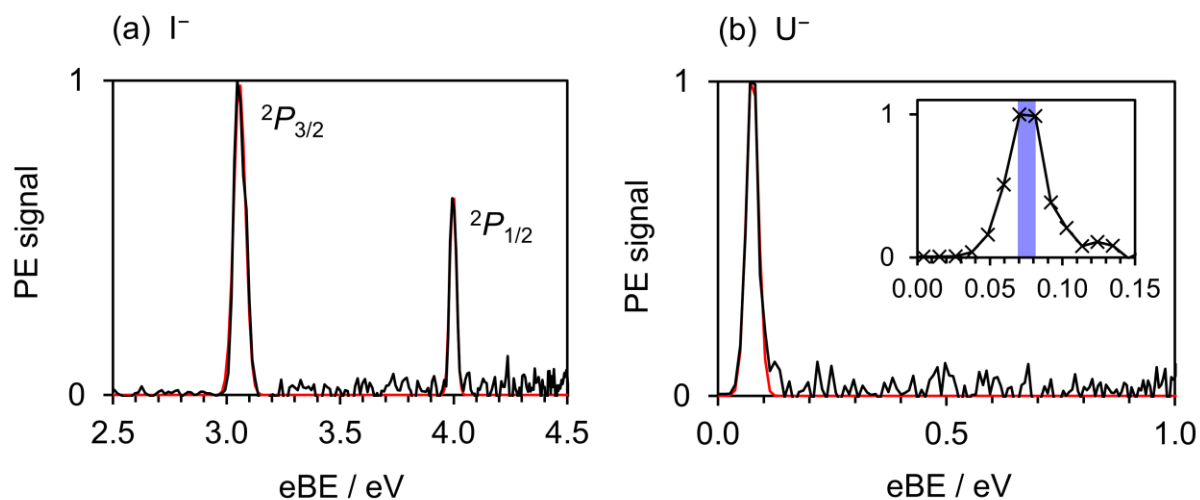

**Fig. S1.** Photoelectron spectra of (a)  $I^-$  and (b)  $U^-$ . Gaussian fits to each peak are shown in red. Inset of (b) shows an expanded view of the DBS peak, with the stated range for  $EA_D$  highlighted in blue.

Immediately after measurement of  $I^-$ , the photoelectron spectrum of  $U^-$  (Fig. S1(b)) was acquired with 1064 nm laser pulses ( $h\nu = 1.165$  eV). The photon energy was lowered due to the smaller electron binding energy for  $U^-$ . Resultantly, the central eKE of the DBS peak was between the eKEs of the two  $I^-$  peaks, ensuring that the calibration was appropriate (and not subject to radial dependencies in the image). The fitted central eBE was found to be  $EA_D =$

+75 meV. Although the DBS peak has a notable width ( $\sigma = 13$  meV), the peak center can be determined to a greater precision. We extract an uncertainty of  $\pm 6$  meV, which is displayed in inset of Fig. S1(b). Repeated measurements at different wavelengths have also given consistent values for  $EA_D$ .

### ***Dominant vibrational excitation***

In the calculated vibronic spectrum from the  $\pi_1^*$  valence state of  $U^-$ , the vibrational progression is dominated by the excitation of the  $\nu_{15}$  vibrational mode. Fig. S2 shows the displacement vectors for this vibrational mode. The corresponding motion clearly connects the planar neutral uracil molecule with the non-planar geometry of the  $\pi_1^*$  valence state anion.

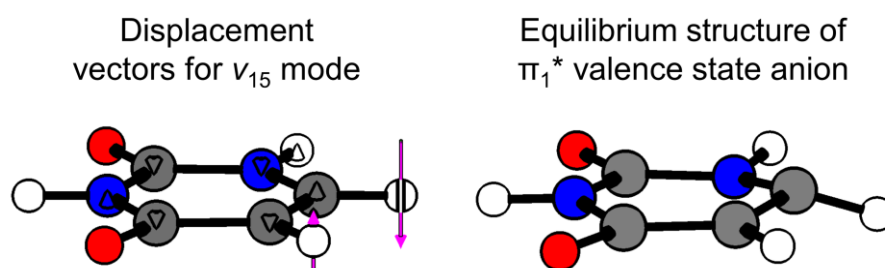

**Fig. S2.** Calculated displacement vectors (pink) for the  $\nu_{15}$  vibrational mode (left), that contributed most to the calculated vibronic spectrum. For comparison, the calculated, optimized geometry of  $U^-$  in its  $\pi_1^*$  valence state is also shown (right).

### **References**

- 1 C. Desfr  ois, H. Abdoul-Carime and J. P. Schermann, *The Journal of Chemical Physics*, 1996, **104**, 7792–7794.
- 2 C. Desfr  ois, V. Periquet, Y. Bouteiller and J. P. Schermann, *J. Phys. Chem. A*, 1998, **102**, 1274–1278.
- 3 J. H. Hendricks, S. A. Lyapustina, H. L. de Clercq, J. T. Snodgrass and K. H. Bowen, *The Journal of Chemical Physics*, 1996, **104**, 7788–7791.
- 4 J. Schiedt, R. Weinkauff, D. M. Neumark and E. W. Schlag, *Chemical Physics*, 1998, **239**, 511–524.
- 5 D. Hanstorp and M. Gustafsson, *J. Phys. B: At. Mol. Opt. Phys.*, 1992, **25**, 1773.
- 6 J. E. Sansonetti and W. C. Martin, *Journal of Physical and Chemical Reference Data*, 2005, **34**, 1559–2259.
